# Supplementary material
Source: PubMed Central journal article supplement (PMC3165085)

Supplemental material for Figure 2, S1.

I. NAEFRHNSGY

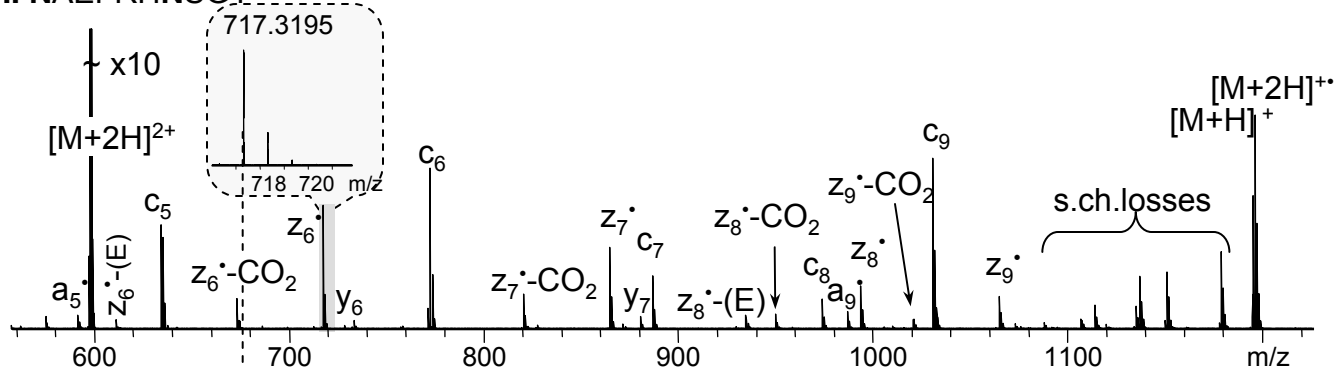

IV. NAEFRHDSGY

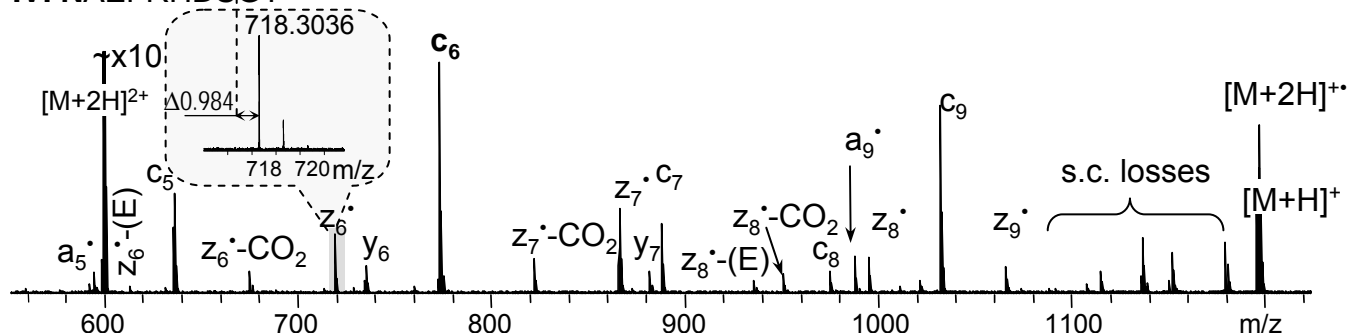

V. NAEFRHiDSGY

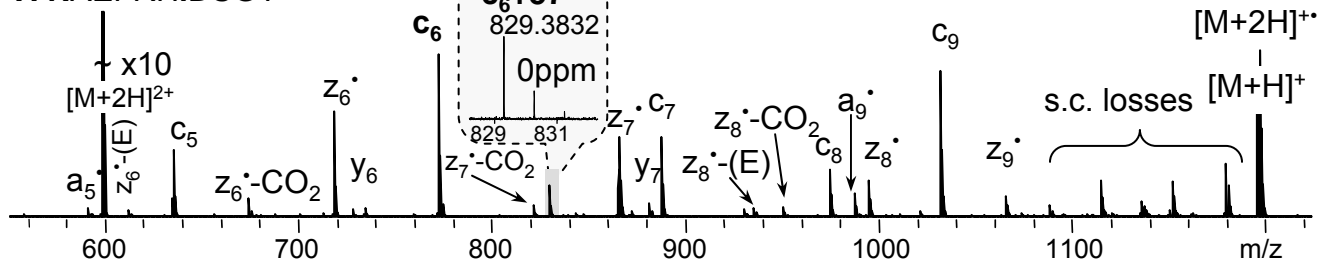

VI. NAEFRHiDSGY

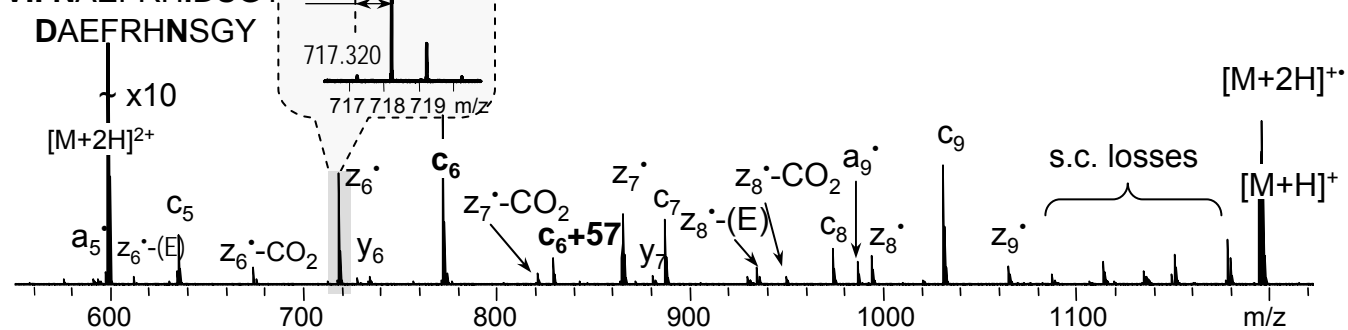

DAEFRHNSGY

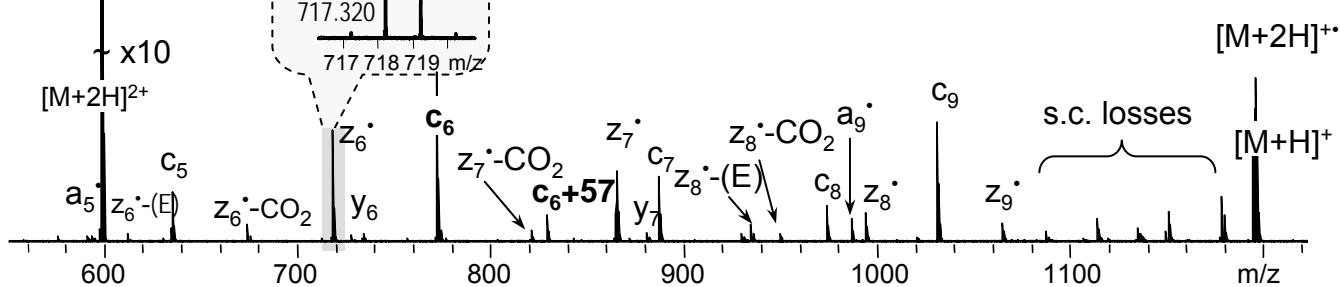

VII. iDAEFRHNSGY

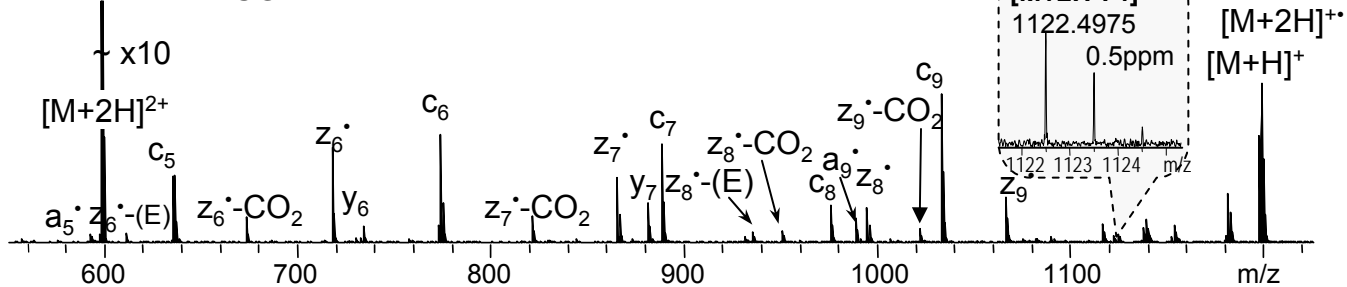

Supplement: NIHMS315667-supplement-1_si_001.pdf [file NIHMS315667-supplement-1_si_001.pdf]
